CORRECTION

# Correction: Aberrant gene expression by Sertoli cells in infertile men with Sertoli cell-only syndrome

The PLOS ONE Staff

There are errors in the author affiliations. The publisher apologizes for the errors. The correct affiliations are as follows:

Darius A. Paduch<sup>1,2</sup>, Stephanie Hilz<sup>3,4</sup>, Andrew Grimson<sup>3</sup>, Peter N. Schlegel<sup>1</sup>, Anne E. Jedlicka<sup>5</sup>, William W. Wright<sup>6</sup>

**1** Department of Urology, Weill Cornell Medical College, New York, NY, United States of America, **2** Consulting Research Services, Inc, North Bergen, N.J., United States of America, **3** Department of Molecular Biology and Genetics, Cornell University, Ithaca, NY, United States of America, **4** Department of Neurological Surgery, University of California, San Francisco, California, United States of America, **5** Genomic Analysis and Sequencing Core Facility, Johns Hopkins Bloomberg School of Public Health, Baltimore, Maryland, United States of America, **6** Department of Biochemistry and Molecular Biology, Johns Hopkins Bloomberg School of Public Health, Baltimore, Maryland, United States of America.

## Reference

1. Paduch DA, Hilz S, Grimson A, Schlegel PN, Jedlicka AE, Wright WW (2019) Aberrant gene expression by Sertoli cells in infertile men with Sertoli cell-only syndrome. PLoS ONE 14(5): e0216586. <https://doi.org/10.1371/journal.pone.0216586> PMID: 31071133

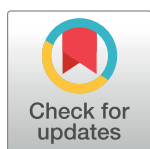

## OPEN ACCESS

**Citation:** The PLOS ONE Staff (2019) Correction: Aberrant gene expression by Sertoli cells in infertile men with Sertoli cell-only syndrome. PLoS ONE 14(8): e0221648. <https://doi.org/10.1371/journal.pone.0221648>

**Published:** August 20, 2019

**Copyright:** © 2019 The PLOS ONE Staff. This is an open access article distributed under the terms of the [Creative Commons Attribution License](https://creativecommons.org/licenses/by/4.0/), which permits unrestricted use, distribution, and reproduction in any medium, provided the original author and source are credited.
